# Supplementary material for: Gas-phase electronic spectra of HC2n+1H+ (n = 2–6) chains
Source: Royal Society of Chemistry journal article supplement (doi:10.1039/d4cp00625a), 2024-01-01
Supplement: d4cp00625a1.pdf [file d4cp00625a1.pdf]

# Electronic Supplementary Information: “Gas-phase Electronic Spectra of $\text{HC}_{2n+1}\text{H}^+$ ( $n=2-6$ ) Chains”

Samuel J.P. Marlton, Chang Liu, Patrick Watkins, and Evan J. Bieske\*

*School of Chemistry, The University of Melbourne, Victoria, Australia 3010*

E-mail: [evanjb@unimelb.edu.au](mailto:evanjb@unimelb.edu.au)

## Contents

|    |                                                                                                                                                     |    |
|----|-----------------------------------------------------------------------------------------------------------------------------------------------------|----|
| S1 | Calculated ground state vibrational frequencies                                                                                                     | S1 |
| S2 | Experimental band positions                                                                                                                         | S3 |
| S3 | Spectra for $\tilde{A} \leftarrow \tilde{X}$ origin transitions for $\text{HC}_5\text{H}^+$ , $\text{HC}_7\text{H}^+$ , and $\text{HC}_9\text{H}^+$ | S5 |
| S4 | Formation of $\text{HC}_{11}\text{H}^+$ from cyclic $\text{C}_9^+ + \text{HCCH}$                                                                    | S6 |
| S5 | Spectrum of $\text{DC}_{11}\text{D}^+$                                                                                                              | S7 |
| S6 | Comparison of weak $\text{HC}_{11}\text{H}^+$ bands and DIBs                                                                                        | S8 |
|    | References                                                                                                                                          | S8 |

## S1 Calculated ground state vibrational frequencies

Table S1: Ground state vibrational frequencies for  $\text{HC}_5\text{H}^+$  and  $\text{HC}_7\text{H}^+$  calculated using CCSD/def2-SVP.

| $\text{HC}_5\text{H}^+$ |            |                            | $\text{HC}_7\text{H}^+$ |            |                            |
|-------------------------|------------|----------------------------|-------------------------|------------|----------------------------|
| mode                    | symmetry   | frequency $\text{cm}^{-1}$ | mode                    | symmetry   | frequency $\text{cm}^{-1}$ |
| $\nu_1$                 | $\sigma_g$ | 3419                       | $\nu_1$                 | $\sigma_g$ | 3442                       |
| $\nu_2$                 | $\sigma_g$ | 2063                       | $\nu_2$                 | $\sigma_g$ | 2151                       |
| $\nu_3$                 | $\sigma_g$ | 781                        | $\nu_3$                 | $\sigma_g$ | 1711                       |
| $\nu_4$                 | $\sigma_u$ | 3414                       | $\nu_4$                 | $\sigma_g$ | 568                        |
| $\nu_5$                 | $\sigma_u$ | 1900                       | $\nu_5$                 | $\sigma_u$ | 3442                       |
| $\nu_6$                 | $\sigma_u$ | 1595                       | $\nu_6$                 | $\sigma_u$ | 2098                       |
| $\nu_7$                 | $\pi_g$    | 556                        | $\nu_7$                 | $\sigma_u$ | 1764                       |
| $\nu_8$                 | $\pi_g$    | 317                        | $\nu_8$                 | $\sigma_u$ | 1091                       |
| $\nu_9$                 | $\pi_u$    | 533                        | $\nu_9$                 | $\pi_g$    | 640                        |
| $\nu_{10}$              | $\pi_u$    | 383                        | $\nu_{10}$              | $\pi_g$    | 461                        |
| $\nu_{11}$              | $\pi_u$    | 119                        | $\nu_{11}$              | $\pi_g$    | 127                        |
|                         |            |                            | $\nu_{12}$              | $\pi_u$    | 628                        |
|                         |            |                            | $\nu_{13}$              | $\pi_u$    | 498                        |
|                         |            |                            | $\nu_{14}$              | $\pi_u$    | 296                        |
|                         |            |                            | $\nu_{15}$              | $\pi_u$    | 95                         |

Table S2: Ground state vibrational frequencies for  $\text{HC}_9\text{H}^+$  and  $\text{HC}_{11}\text{H}^+$  calculated using CCSD/def2-SVP.

| $\text{HC}_9\text{H}^+$ |            |                            | $\text{HC}_{11}\text{H}^+$ |            |                            |
|-------------------------|------------|----------------------------|----------------------------|------------|----------------------------|
| mode                    | symmetry   | frequency $\text{cm}^{-1}$ | mode                       | symmetry   | frequency $\text{cm}^{-1}$ |
| $\nu_1$                 | $\sigma_g$ | 3458                       | $\nu_1$                    | $\sigma_g$ | 3357                       |
| $\nu_2$                 | $\sigma_g$ | 2179                       | $\nu_2$                    | $\sigma_g$ | 2138                       |
| $\nu_3$                 | $\sigma_g$ | 2105                       | $\nu_3$                    | $\sigma_g$ | 2088                       |
| $\nu_4$                 | $\sigma_g$ | 1261                       | $\nu_4$                    | $\sigma_g$ | 1747                       |
| $\nu_5$                 | $\sigma_g$ | 448                        | $\nu_5$                    | $\sigma_g$ | 1057                       |
| $\nu_6$                 | $\sigma_u$ | 3457                       | $\nu_6$                    | $\sigma_g$ | 368                        |
| $\nu_7$                 | $\sigma_u$ | 2161                       | $\nu_7$                    | $\sigma_u$ | 3356                       |
| $\nu_8$                 | $\sigma_u$ | 1767                       | $\nu_8$                    | $\sigma_u$ | 2158                       |
| $\nu_9$                 | $\sigma_u$ | 1599                       | $\nu_9$                    | $\sigma_u$ | 2002                       |
| $\nu_{10}$              | $\sigma_u$ | 860                        | $\nu_{10}$                 | $\sigma_u$ | 1872                       |
| $\nu_{11}$              | $\pi_g$    | 685                        | $\nu_{11}$                 | $\sigma_u$ | 1376                       |
| $\nu_{12}$              | $\pi_g$    | 518                        | $\nu_{12}$                 | $\sigma_u$ | 719                        |
| $\nu_{13}$              | $\pi_g$    | 314                        | $\nu_{13}$                 | $\pi_g$    | 596                        |
| $\nu_{14}$              | $\pi_g$    | 68                         | $\nu_{14}$                 | $\pi_g$    | 495                        |
| $\nu_{15}$              | $\pi_u$    | 693                        | $\nu_{15}$                 | $\pi_g$    | 418                        |
| $\nu_{16}$              | $\pi_u$    | 492                        | $\nu_{16}$                 | $\pi_g$    | 246                        |
| $\nu_{17}$              | $\pi_u$    | 405                        | $\nu_{17}$                 | $\pi_g$    | 91                         |
| $\nu_{18}$              | $\pi_u$    | 183                        | $\nu_{18}$                 | $\pi_u$    | 596                        |
| $\nu_{19}$              | $\pi_u$    | 29                         | $\nu_{19}$                 | $\pi_u$    | 516                        |
|                         |            |                            | $\nu_{20}$                 | $\pi_u$    | 463                        |
|                         |            |                            | $\nu_{21}$                 | $\pi_u$    | 356                        |
|                         |            |                            | $\nu_{22}$                 | $\pi_u$    | 167                        |
|                         |            |                            | $\nu_{23}$                 | $\pi_u$    | 35                         |

## S2 Experimental band positions

Table S3: Band positions, widths, and assignments for REPD spectra of  $\text{HC}_5\text{H}^+$  and  $\text{HC}_7\text{H}^+$  chains.

| cluster                 | $\lambda_{air}$<br>nm   | FWHM<br>nm | wavenumber<br>$\text{cm}^{-1}$ (vac) | $\Delta\nu$<br>$\text{cm}^{-1}$ | assignment                                     |
|-------------------------|-------------------------|------------|--------------------------------------|---------------------------------|------------------------------------------------|
| $\text{HC}_5\text{H}^+$ | 498.7±0.2               | 0.2        | 20048                                | -27                             |                                                |
|                         | 498.0±0.2               | 0.2        | 20075                                | 0                               | $\tilde{A}^2\Pi_g \leftarrow \tilde{X}^2\Pi_u$ |
|                         | 487.8±0.2               | 0.2        | 20495                                | 420                             | $2\nu_8$                                       |
|                         | 486.9±0.2               | 0.1        | 20532                                | 457                             | $2\nu_{10}$                                    |
|                         | 456.2±0.2               | 0.1        | 21914                                | 1839                            | $\nu_2$                                        |
|                         | 447.7±0.2               | 0.2        | 22330                                | 2255                            | $\nu_2 + 2\nu_8$                               |
|                         | 447.0±0.2               | 0.2        | 22365                                | 2290                            | $\nu_2 + 2\nu_{10}$                            |
|                         | 421.0±0.2               | 0.1        | 23746                                | 3671                            | $2\nu_2$                                       |
|                         | 361.2±0.3               | 0.6        | 27678                                | 0                               | $\tilde{B}^2\Pi_g \leftarrow \tilde{X}^2\Pi_u$ |
|                         | 352.3±0.3               | 0.8        | 28377                                | 699                             | $\nu_3$                                        |
|                         | 338.4±0.3               | 0.4        | 29542                                | 1864                            | $\nu_2$                                        |
|                         | 330.6±0.3               | 0.4        | 30239                                | 2561                            | $\nu_2 + \nu_3$                                |
|                         | 327.1±0.3               | 0.5        | 30563                                | 0                               | $\tilde{C}^2\Pi_g \leftarrow \tilde{X}^2\Pi_u$ |
|                         | 319.2±0.5               | 1.0        | 31319                                | 756                             | $\nu_3$                                        |
|                         | 308.3±0.8               | 1.2        | 32426                                | 1863                            | $\nu_2$                                        |
|                         | $\text{HC}_7\text{H}^+$ | 598.1±0.2  | 0.2                                  | 16714                           | -29                                            |
| 597.1±0.2               |                         | 0.2        | 16743                                | 0                               | $\tilde{A}^2\Pi_u \leftarrow \tilde{X}^2\Pi_g$ |
| 533.6±0.2               |                         | 0.2        | 18735                                | 1992                            | $\nu_2$                                        |
| 484.9±0.2               |                         | 0.1        | 20617                                | 3874                            | $2\nu_2$                                       |
| 482.5±0.2               |                         | 0.1        | 20720                                | 3977                            |                                                |
| 447.0±0.8               |                         | 0.8        | 22365                                | 0                               | $\tilde{B}^2\Pi_u \leftarrow \tilde{X}^2\Pi_g$ |
| 445.6±0.8               |                         | 0.6        | 22435                                | 69                              |                                                |
| 436.0±0.8               |                         | 1.2        | 22929                                | 564                             | $\nu_4$                                        |

Table S4: Band positions, widths, and assignments for REPD spectra of  $\text{HC}_9\text{H}^+$ ,  $\text{HC}_{11}\text{H}^+$  and  $\text{HC}_{13}\text{H}^+$  chains. Band widths are upper limits except for the 545.1 nm and 542.3 nm transitions of  $\text{HC}_{11}\text{H}^+$ .

| cluster                    | $\lambda_{air}$<br>nm | FWHM<br>nm | wavenumber<br>$\text{cm}^{-1}$ (vac) | $\Delta\nu$<br>$\text{cm}^{-1}$ | assignment                                     |
|----------------------------|-----------------------|------------|--------------------------------------|---------------------------------|------------------------------------------------|
| $\text{HC}_9\text{H}^+$    | 695.5±0.2             | 0.3        | 14372                                | -27                             |                                                |
|                            | 694.3±0.3             | 0.3        | 14399                                | 0                               | $\tilde{A}^2\Pi_g \leftarrow \tilde{X}^2\Pi_u$ |
|                            | 609.4±0.2             | 0.3        | 16405                                | 2006                            | $\nu_2$                                        |
|                            | 554.7±0.2             | 1.0        | 18023                                | 3624                            |                                                |
|                            | 552.7±0.2             | 0.5        | 18088                                | 3689                            |                                                |
|                            | 548.0±0.2             | 0.5        | 18243                                | 3844                            |                                                |
|                            | 543.1±0.2             | 0.5        | 18408                                | 4009                            | $2\nu_2$                                       |
|                            | 537.2±0.2             | 0.5        | 18610                                | 4211                            |                                                |
|                            | 527.2±1.0             | 3.0        | 18963                                | 0                               | $\tilde{B}^2\Pi_g \leftarrow \tilde{X}^2\Pi_u$ |
|                            | 478.5±0.5             | 2.0        | 20893                                | 1930                            | $\nu_2$                                        |
|                            | 475.7±0.5             | 2.0        | 21016                                | 0                               | $\tilde{C}^2\Pi_g \leftarrow \tilde{X}^2\Pi_u$ |
|                            | 466.3±0.5             | 2.0        | 21439                                | 423                             | $\nu_5$                                        |
|                            | 436.2±1.0             | 1.0        | 22919                                | 1903                            | $\nu_3$                                        |
|                            | 433.0±2.0             | 2.0        | 23088                                | 2072                            | $\nu_2$                                        |
|                            | 425.5±2.0             | 2.0        | 23495                                | 2479                            | $\nu_2 + \nu_5$                                |
| $\text{HC}_{11}\text{H}^+$ | 786.8±0.5             | 0.5        | 12709                                | 0                               | $\tilde{A}^2\Pi_u \leftarrow \tilde{X}^2\Pi_g$ |
|                            | 682.2±0.5             | 0.3        | 14654                                | 1945                            | $\nu_3$                                        |
|                            | 679.3±0.5             | 0.3        | 14717                                | 2008                            | $\nu_2$                                        |
|                            | 621.5±0.5             | 0.4        | 16086                                |                                 | mixed                                          |
|                            | 620.7±0.5             | 0.4        | 16106                                |                                 | mixed                                          |
|                            | 619.2±0.5             | 0.4        | 16145                                |                                 | mixed                                          |
|                            | 613.1±0.5             | 0.4        | 16306                                |                                 | mixed                                          |
|                            | 611.5±0.5             | 0.4        | 16349                                |                                 | mixed                                          |
|                            | 606.2±0.5             | 0.4        | 16492                                |                                 | mixed                                          |
|                            | 602.3±0.5             | 0.4        | 16598                                |                                 | mixed                                          |
|                            | 596.6±0.5             | 0.4        | 16757                                |                                 | mixed                                          |
|                            | 545.1±0.3             | 1.5±0.5    | 18340                                | 0                               | $\tilde{C}^2\Pi_u \leftarrow \tilde{X}^2\Pi_g$ |
|                            | 542.3±0.4             | 1.0±0.5    | 18435                                | 95                              | mixed                                          |
|                            | 491.2±1.0             | 3.0        | 20352                                | 2012                            | $\nu_2$                                        |
| $\text{HC}_{13}\text{H}^+$ | 873.8±0.6             | 0.8        | 11441                                | 0                               | $\tilde{A}^2\Pi_g \leftarrow \tilde{X}^2\Pi_u$ |
|                            | 688.4±1.0             | 6.0        | 14522                                | 0                               | $\tilde{B}^2\Pi_g \leftarrow \tilde{X}^2\Pi_u$ |
|                            | 606.0±1.0             | 4.0        | 16497                                | 0                               | $\tilde{C}^2\Pi_g \leftarrow \tilde{X}^2\Pi_u$ |
|                            | 540.9±1.0             | 3.0        | 18483                                | 1986                            | $\nu_4$                                        |
|                            | 534.3±2.0             | 4.0        | 18711                                | 2214                            | $\nu_4 + \nu_7$                                |
|                            | 488.7±1.0             | 1.0        | 20457                                | 3960                            | $2\nu_4$                                       |

S3 Spectra for  $\tilde{A} \leftarrow \tilde{X}$  origin transitions for  $\text{HC}_5\text{H}^+$ ,  $\text{HC}_7\text{H}^+$ , and  $\text{HC}_9\text{H}^+$

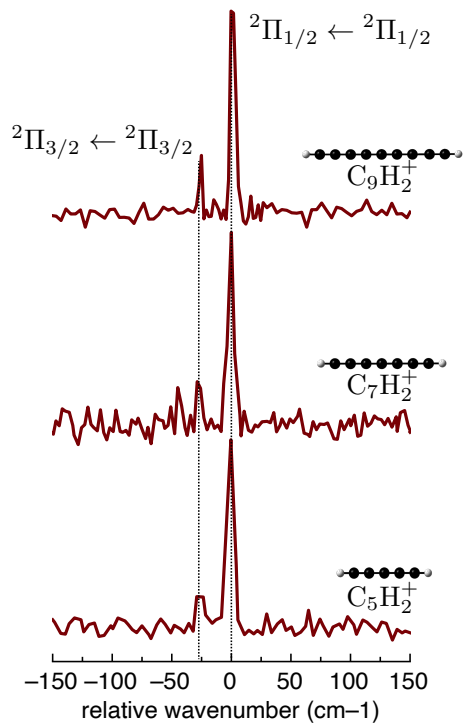

Figure S1:  $\tilde{A}^2\Pi_{g/u} \leftarrow \tilde{X}^2\Pi_{g/u}$  origin transitions for  $\text{HC}_5\text{H}^+$ ,  $\text{HC}_7\text{H}^+$ , and  $\text{HC}_9\text{H}^+$ . The weaker bands assigned to the  $\tilde{A}^2\Pi_{3/2} \leftarrow \tilde{X}^2\Pi_{3/2}$  transition occur respectively  $26\text{ cm}^{-1}$ ,  $29\text{ cm}^{-1}$ , and  $27\text{ cm}^{-1}$  below the more intense  $\tilde{A}^2\Pi_{1/2} \leftarrow \tilde{X}^2\Pi_{1/2}$  bands.

## S4 Formation of $\text{HC}_{11}\text{H}^+$ from cyclic $\text{C}_9^+$ +HCCH

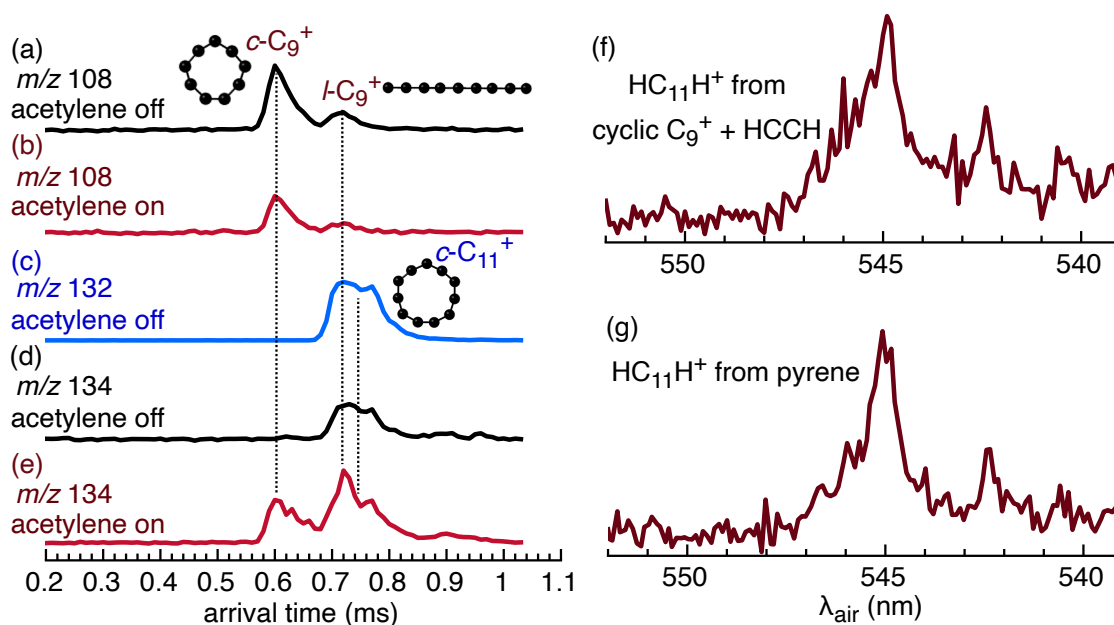

Figure S2: Ion mobility arrival time distributions selecting (a-b)  $m/z$  108, (c)  $m/z$  132, and (d-e)  $m/z$  134. For (b) and (e), the ions were reacted with acetylene for up to  $\approx 500$  ms after the ion mobility drift region in the hexapole ion guide. (f) REPD spectrum of  $m/z$  134 ions formed by reacting mobility-selected  $c\text{-C}_9^+$  ions with acetylene. (g) REPD spectrum of  $\text{HC}_{11}\text{H}^+$  formed by photolysing pyrene with a pulses of 266 nm light.

Figures S2(a) and (b) show the arrival time distribution (ATD) for  $\text{C}_9^+$  ions ( $m/z$  108) without and with acetylene in the hexapole ion guide, respectively. The ATD for  $\text{C}_9^+$  shows a peak for a cyclic isomer ( $t_a \approx 0.60$  ms) and a linear isomer ( $t_a \approx 0.72$  ms), both of which are depleted by reactions with acetylene. The arrival time distribution obtained by monitoring  $m/z$  134 ions without acetylene in the hexapole is shown in Figure S2(d). Most of these  $m/z$  134 ions are presumably  $\text{C}_{11}^+$  containing two  $^{13}\text{C}$  atoms, based on comparisons with the arrival time of  $m/z$  132  $\text{C}_{11}^+$  (Figure S2(c)). When the carbon clusters are allowed to react with acetylene in the hexapole, there is a significant increase in the  $m/z$  134 signal at the arrival time for cyclic  $\text{C}_9^+$  indicating that cyclic  $\text{C}_9^+$  reacted with acetylene to form  $\text{C}_{11}\text{H}_2^+$   $m/z$  134 product ions.

To explore the nature of the  $\text{C}_{11}\text{H}_2^+$  product ions, cyclic  $\text{C}_9^+$  ions were isomer-selected using the ion-gate, and reacted with acetylene (see Figure 1(b)). The  $m/z$  134 products were then mass-selected by the QMF and spectroscopically probed in the cryogenic ion-trap. The REPD spectrum of  $\text{HC}_{11}\text{H}^+$  ions formed by reacting cyclic  $\text{C}_9^+$  with acetylene (Figures S2(f)) is almost identical with the REPD spectrum of  $\text{HC}_{11}\text{H}^+$  ions generated through the 266 nm photolysis of pyrene (Figure S2(g)), demonstrating that linear  $\text{HC}_{11}\text{H}^+$  can be generated by bottom-up and top-down routes.

## S5 Spectrum of $\text{DC}_{11}\text{D}^+$

$\text{HC}_{11}\text{H}^+$  is not the first hydrocarbon with an absorption band matching the  $\lambda 5450$  DIB. Previously, Linnartz *et al.* observed an absorption peak in an acetylene plasma using cavity ring down spectroscopy with position and width matching the  $\lambda 5450$  DIB,<sup>1</sup> The responsible species was later argued to be  $\text{H}_2\text{CCC}$ , leading to its assignment as the carrier of the  $\lambda 5450$  DIB,<sup>2</sup> an attribution that was later challenged.<sup>3</sup> To test whether the  $\text{HC}_{11}\text{H}^+$  cation contributed to the 545 nm absorption observed by Linnartz *et al.* we measured the electronic spectra of  $\text{DC}_{11}\text{D}^+$  formed from deuterated pyrene (Figure S3) finding that the  $\text{HC}_{11}\text{H}^+$  band is blue-shifted by 0.3 nm upon deuteration, whereas the band reported in ref. 1 was shifted 1.5 nm to the red. Therefore, we conclude that the species formed in the acetylene plasma reported in ref. 1 is definitely not  $\text{HC}_{11}\text{H}^+$ .

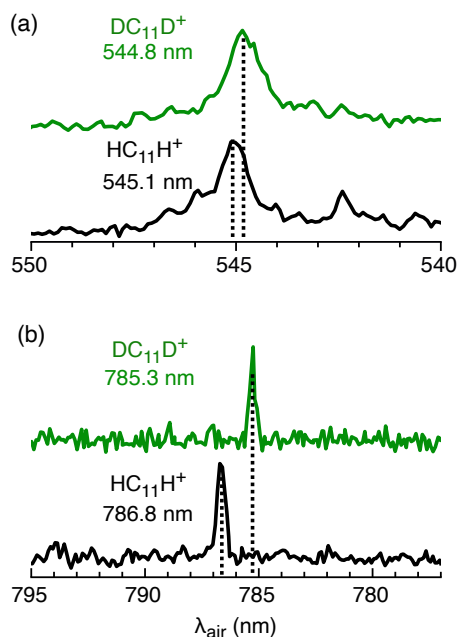

Figure S3: (a)  $\tilde{C}^2\Pi_u \leftarrow \tilde{X}^2\Pi_g$  origin transitions for  $\text{DC}_{11}\text{D}^+$  (upper) and  $\text{HC}_{11}\text{H}^+$  (lower). (b)  $\tilde{A}^2\Pi_u \leftarrow \tilde{X}^2\Pi_g$  origin transitions for  $\text{DC}_{11}\text{D}^+$  (upper) and  $\text{HC}_{11}\text{H}^+$  (lower). The  $\text{HC}_5\text{H}^+$  and  $\text{DC}_5\text{D}^+$  ions were generated from pyrene and deuterated pyrene, respectively.



## S6 Comparison of weak $\text{HC}_{11}\text{H}^+$ bands and DIBs

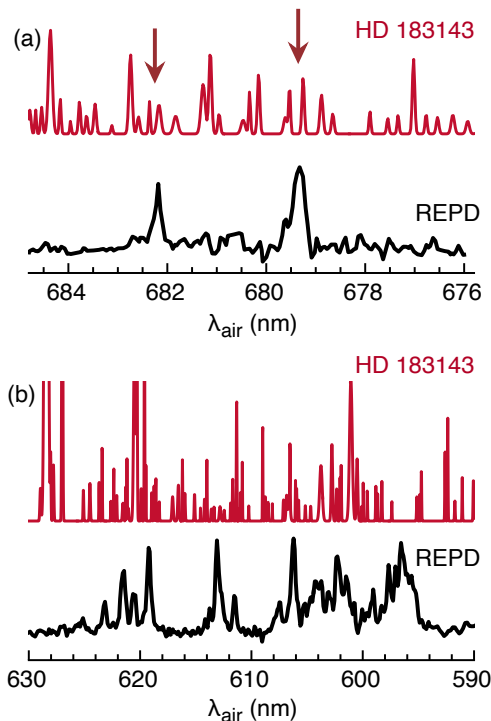

Figure S4: Laboratory REPD spectra of  $\text{HC}_{11}\text{H}^+$  in the visible range. The spectra contain transitions to states with mixed  $\tilde{A}$  and  $\tilde{B}$  character. The REPD spectra are compared with synthetic astronomical DIB spectra for HD183143 generated using data from ref. 4. Arrows indicate DIBs close to the  $\text{HC}_{11}\text{H}^+$  absorptions.

## References

- (1) Linnartz, H.; Wehres, N.; Van Winckel, H.; Walker, G.; Bohlender, D.; Tielens, A.; Motylewski, T.; Maier, J. A coincidence between a hydrocarbon plasma absorption spectrum and the  $\lambda 5450$  DIB. *Astron. Astrophys.* **2010**, *511*, L3.
- (2) Maier, J.; Walker, G.; Bohlender, D.; Mazzotti, F.; Raghunandan, R.; Fulara, J.; Garkusha, I.; Nagy, A. Identification of  $\text{H}_2\text{CCC}$  as a diffuse interstellar band carrier. *Astrophys. J.* **2010**, *726*, 41.
- (3) Krelowski, J.; Galazutdinov, G.; Kołos, R. Can  $\text{H}_2\text{CCC}$  be the carrier of broad diffuse bands? *Astrophys. J.* **2011**, *735*, 124.
- (4) Hobbs, L. M.; York, D. G.; Thorburn, J. A.; Snow, T. P.; Bishof, M.; Friedman, S. D.; McCall, B. J.; Oka, T.; Rachford, B.; Sonnentrucker, P.; Welty, D. E. Studies of the diffuse interstellar bands. III. HD 183143. *Astrophys. J.* **2009**, *705*, 32.
